# Supplementary material for: Hydroxyl ions: flexible tailoring of Cu2O crystal morphology
Source: Royal Society of Chemistry journal article supplement (doi:10.1039/d1ra03296h), 2021-01-01
Supplement: d1ra03296h1.pdf [file d1ra03296h1.pdf]

## Supporting information

### Hydroxyl Ions: Flexible Tailoring of Cu<sub>2</sub>O Crystals Morphology

Xiaodong Yang<sup>a</sup>, Jia Li<sup>c</sup>, Jianhua Yao<sup>\*,c</sup>, Tianrui Ren<sup>\*,b</sup>, Bo Zhang<sup>\*,b</sup>

<sup>a</sup>State Key Laboratory Breeding Base of Green Pesticide and Agricultural Bioengineering/Key Laboratory of Green Pesticide and Agricultural Bioengineering, Ministry of Education, Guizhou University, Guiyang, 550025, P. R. China

<sup>b</sup>Shanghai Engineering Research Center of Green Energy Chemical Engineering, College of Chemistry and Materials Science, Shanghai Normal University, 100 Guilin Road, Shanghai, 200234, P. R. China.

<sup>c</sup>CAS Key laboratory of Energy Regulation Materials, Shanghai Institute of Organic Chemistry, Chinese Academy of Sciences, Shanghai 200032, China

\* Corresponding author:

Prof. Tianrui Ren, E-mail address: [trren@shnu.edu.cn](mailto:trren@shnu.edu.cn)

Prof. Jianhua Yao, E-mail: [yaojh@mail.sioc.ac.cn](mailto:yaojh@mail.sioc.ac.cn).

Dr. Bo Zhang, E-mail address: [zb830216@shnu.edu.cn](mailto:zb830216@shnu.edu.cn)

**Table S1.** Average particle sizes of the Cu<sub>2</sub>O nanocrystals synthesized.

| <b>Volume of 1.0 M NaOH</b> | <b>R value</b> | <b>pH value</b> |
|-----------------------------|----------------|-----------------|
| 0.750 mL                    | 1              | 4.72            |
| 1.500 mL                    | 2              | 5.35            |
| 2.250 mL                    | 3              | 5.52            |
| 2.625 mL                    | 3.5            | 5.73            |
| 3.000 mL                    | 4              | 7.52            |
| 3.750 mL                    | 5              | 8.78            |
| 4.500 mL                    | 6              | 9.44            |
| 4.875 mL                    | 6.5            | 10.75           |
| 4.950 mL                    | 6.6            | 11.34           |
| 5.025 mL                    | 6.7            | 11.81           |
| 5.100 mL                    | 6.8            | 12.07           |
| 5.175 mL                    | 6.9            | 12.23           |
| 5.250 mL                    | 7              | 12.47           |
| 6.000 mL                    | 8              | 12.89           |
| 6.750 mL                    | 9              | 13.16           |
| 7.500 mL                    | 10             | 13.57           |

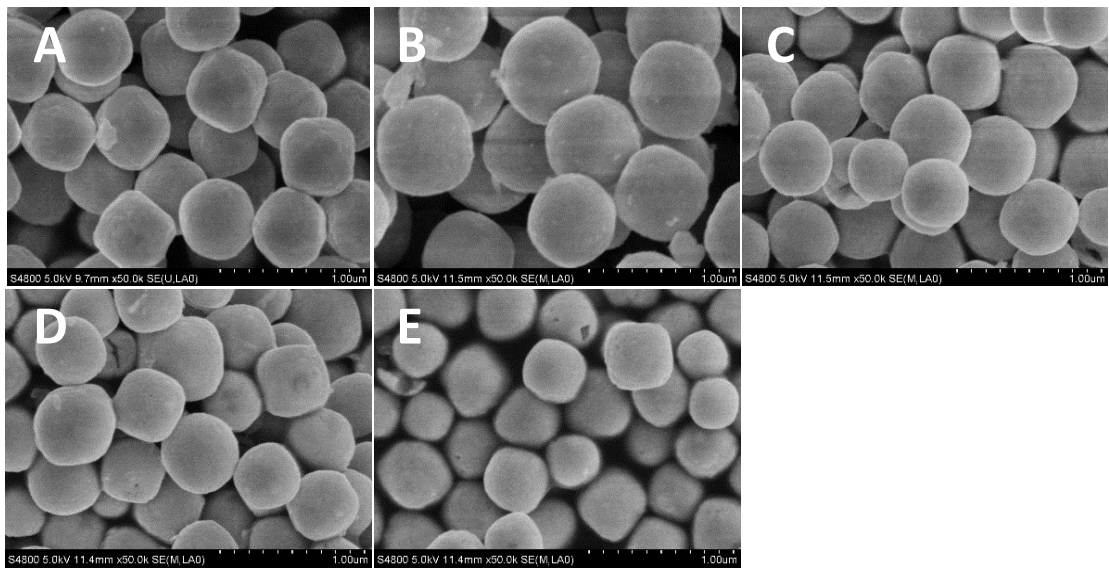

**Figure S1.** FESEM images of different Cu<sub>2</sub>O morphologies obtained with the different molar ratios of OH<sup>-</sup> to Cu<sup>2+</sup> (A) 6.5:1, (B) 6.6:1, (C) 6.7:1, (D) 6.8:1 and (E) 6.9:1.

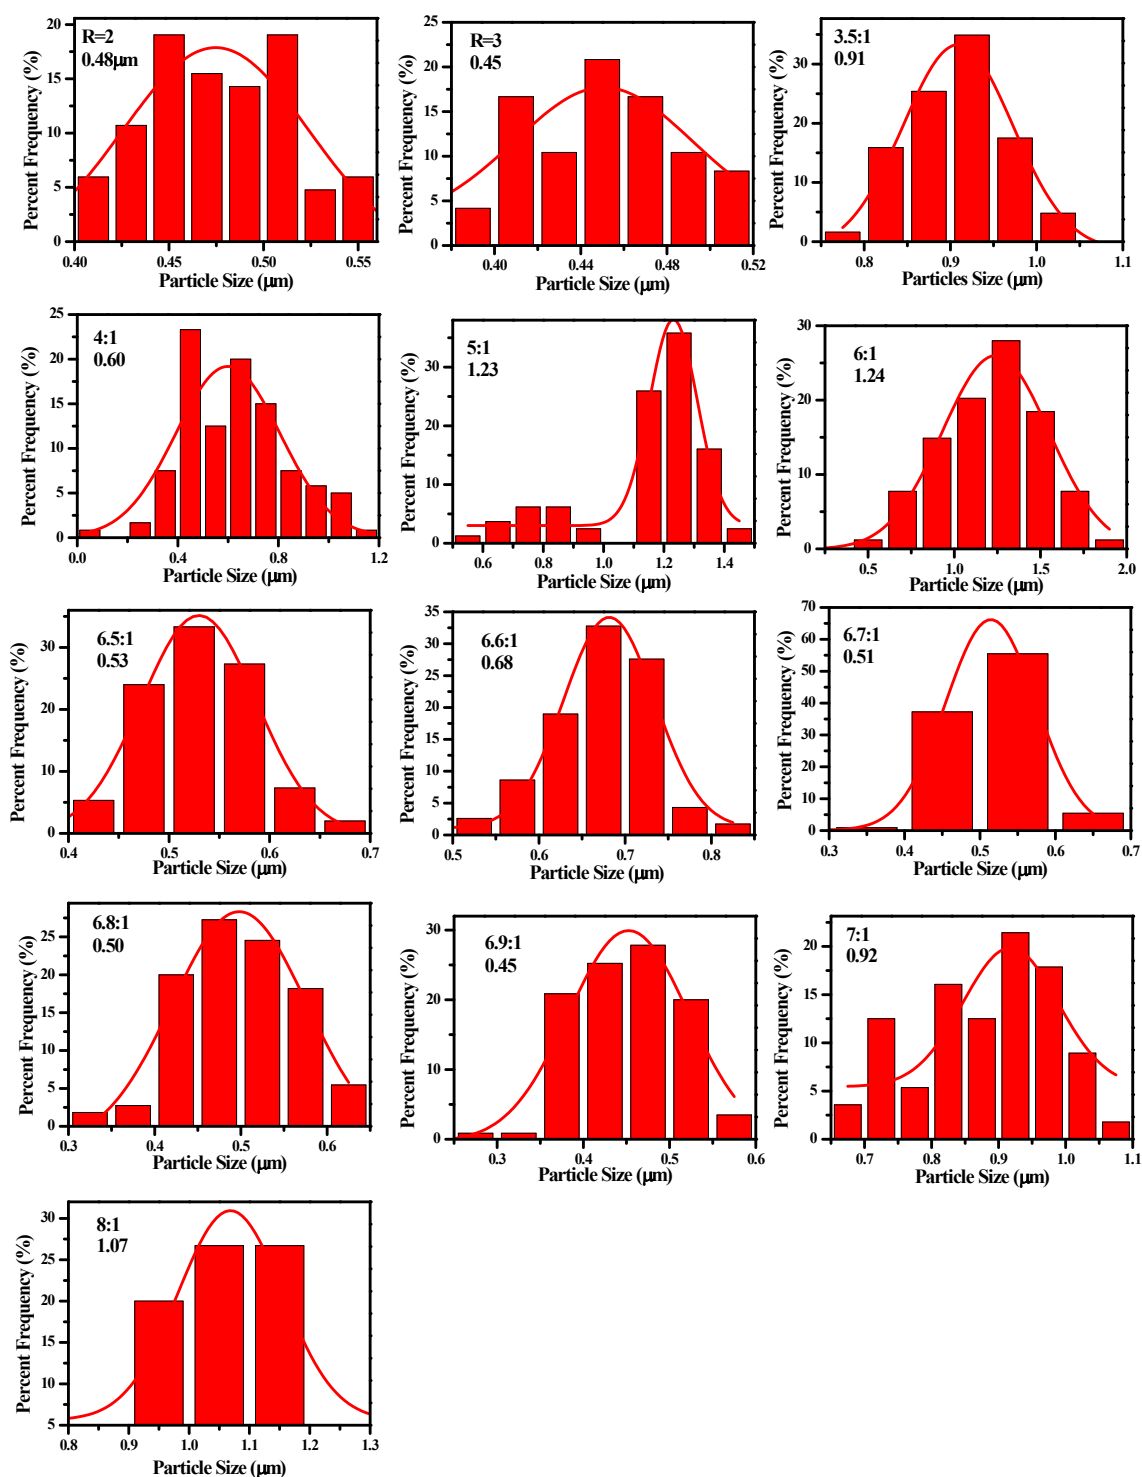

**Figure S2. Size distribution histograms for the obtained Cu<sub>2</sub>O crystals**

**Table S2.** Average particle sizes and average crystal size of the Cu<sub>2</sub>O nanocrystals synthesized.

| <b>Sample</b>             | <b>Average Particle Size<br/>(nm)</b> | <b>Average Crystal Size<br/>(nm)</b> |
|---------------------------|---------------------------------------|--------------------------------------|
| Cu <sub>2</sub> O (R=2)   | 480 ± 4.8                             | 34.8                                 |
| Cu <sub>2</sub> O (R=3)   | 450 ± 3.5                             | 33.3                                 |
| Cu <sub>2</sub> O (R=3.5) | 910 ± 6.7                             | 33.0                                 |
| Cu <sub>2</sub> O (R=4)   | 600 ± 4.2                             | 19.2                                 |
| Cu <sub>2</sub> O (R=5)   | 1230 ± 6.8                            | 27.7                                 |
| Cu <sub>2</sub> O (R=6)   | 1240 ± 12.1                           | 18.7                                 |
| Cu <sub>2</sub> O (R=6.5) | 530 ± 3.8                             | 26.6                                 |
| Cu <sub>2</sub> O (R=6.6) | 680 ± 5.8                             | 19.7                                 |
| Cu <sub>2</sub> O (R=6.7) | 510 ± 3.7                             | 21.0                                 |
| Cu <sub>2</sub> O (R=6.8) | 500 ± 4.6                             | 22.0                                 |
| Cu <sub>2</sub> O (R=6.9) | 450 ± 5.2                             | 17.8                                 |
| Cu <sub>2</sub> O (R=7)   | 920 ± 4.8                             | 38.7                                 |
| Cu <sub>2</sub> O (R=8)   | 1070 ± 11.5                           | 40.3                                 |
| Cu <sub>2</sub> O (R=9)   | 1270 ± 13.7                           | 45.3                                 |
| Cu <sub>2</sub> O (R=10)  | 1380 ± 10.8                           | 34.8                                 |

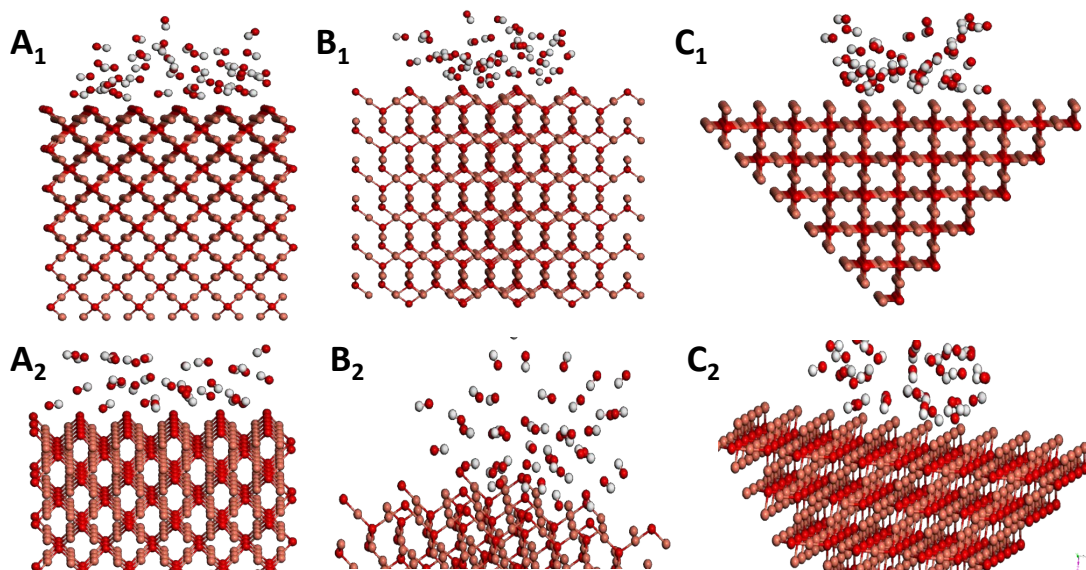

**Figure S3.** Optimized structures of OH<sup>-</sup> ions adsorbed on Cu<sub>2</sub>O (100) (A<sub>1</sub>, A<sub>2</sub>), (111) facets (B<sub>1</sub>, B<sub>2</sub>) and (110) facets (C<sub>1</sub>, C<sub>2</sub>).

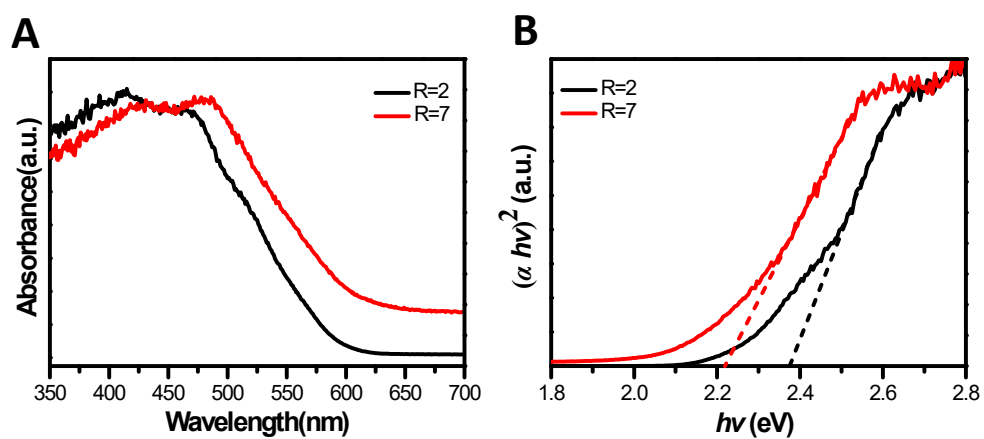

**Fig. S4** (A) Reflectance UV-vis absorption spectra and Tauc plots of RD (R=2) and hexapod Cu<sub>2</sub>O crystals (R=7).
